# Supplementary material for: Chemical Composition of the Cinnamomum malabatrum Leaf Essential Oil and Analysis of Its Antioxidant, Enzyme Inhibitory and Antibacterial Activities
Source: MDPI journal article supplement (doi:10.3390/antibiotics12050940), 2023-05-22
Supplement: s1 [file s1]

Supplementary Table S1. Chemical composition of *C. malabattrum* leaf essential oil.

| Peak no. | RT <sup>a</sup> | Component        | RI <sup>b</sup> | RI <sup>c</sup> | %RA <sup>d</sup> |
|----------|-----------------|------------------|-----------------|-----------------|------------------|
| 1        | 5.99            | Benzaldehyde     | 976             | 966             | 1.50±0.04        |
| 2        | 8.14            | Linalyl acetate  | 1174            | 1104            | 1.36±0.07        |
| 3        | 11.24           | Cinnamaldehyde   | 1277            | 1282            | 12.01±0.54       |
| 4        | 13.02           | Linalool         | 1342            | 1371            | 38.26±0.41       |
| 5        | 13.82           | Methyleugenol    | 1410            | 1410            | 3.40±0.67        |
| 6        | 14.34           | Caryophyllene    | 1433            | 1435            | 11.43±0.52       |
| 7        | 14.69           | Cinnamyl acetate | 1445            | 1451            | 3.26±0.08        |
| 8        | 15.06           | Humulene         | 1464            | 1469            | 5.32±0.12        |
| 9        | 16.43           | Eugenol          | 1482            | 1533            | 8.75±0.23        |
| 10       | 17.85           | Ledene oxide     | 1612            | 1599            | 3.09±0.78        |
| 11       | 21.59           | Benzyl Benzoate  | 1703            | 1677            | 9.60±0.05        |

<sup>a</sup> Retention time; <sup>b</sup> Library retention index; <sup>c</sup> Calculated retention index; <sup>d</sup> Relative area.

Supplementary Table S2. Statistical comparison of the antioxidant activities between the CMEO, linalool and ascorbic acid.

| <b>Tukey's multiple comparisons test</b> | <b>Mean Difference</b> | <b>95.00% CI of difference</b> | <b>Adjusted P Value</b> |
|------------------------------------------|------------------------|--------------------------------|-------------------------|
| <b><u>DPPH</u></b>                       |                        |                                |                         |
| CMEO vs. Linalool                        | -13.72                 | -15.26 to -12.18               | <0.0001                 |
| CMEO vs. Ascorbic acid                   | 13.37                  | 11.83 to 14.91                 | <0.0001                 |
| Linalool vs. Ascorbic acid               | 27.09                  | 25.55 to 28.63                 | <0.0001                 |
| <b><u>ABTS</u></b>                       |                        |                                |                         |
| CMEO vs. Linalool                        | -3.1                   | -4.637 to -1.563               | <0.0001                 |
| CMEO vs. Ascorbic acid                   | 24.09                  | 22.55 to 25.63                 | <0.0001                 |
| Linalool vs. Ascorbic acid               | 27.19                  | 25.65 to 28.73                 | <0.0001                 |
| <b><u>H2O2</u></b>                       |                        |                                |                         |
| CMEO vs. Linalool                        | 4.68                   | 3.143 to 6.217                 | <0.0001                 |
| CMEO vs. Ascorbic acid                   | 23.66                  | 22.12 to 25.2                  | <0.0001                 |
| Linalool vs. Ascorbic acid               | 18.98                  | 17.44 to 20.52                 | <0.0001                 |
| <b><u>FRAP</u></b>                       |                        |                                |                         |
| CMEO vs. Linalool                        | -23.55                 | -25.09 to -22.01               | <0.0001                 |
| CMEO vs. Ascorbic acid                   | -3                     | -4.537 to -1.463               | <0.0001                 |
| Linalool vs. Ascorbic acid               | 20.55                  | 19.01 to 22.09                 | <0.0001                 |
| <b><u>LPO</u></b>                        |                        |                                |                         |
| CMEO vs. Linalool                        | 7.34                   | 5.803 to 8.877                 | <0.0001                 |
| CMEO vs. Ascorbic acid                   | 22.81                  | 21.27 to 24.35                 | <0.0001                 |
| Linalool vs. Ascorbic acid               | 15.47                  | 13.93 to 17.01                 | <0.0001                 |

Supplementary Table S3. Statistical comparison of the enzyme-inhibitory potentials between the CMEQ, linalool and ascorbic acid.

| <b>Tukey's<br/>comparisons test</b>  | <b>multiple</b> | <b>Mean Diff.</b> | <b>95.00% CI of<br/>diff.</b> | <b>Adjusted P<br/>Value</b> |
|--------------------------------------|-----------------|-------------------|-------------------------------|-----------------------------|
| <b><u>a-Amylase</u></b>              |                 |                   |                               |                             |
| CMEQ vs. Linalool                    |                 | 11.85             | 8.315 to 15.39                | <0.0001                     |
| CMEQ vs. Ascorbic acid               |                 | 29.02             | 25.48 to 32.56                | <0.0001                     |
| Linalool vs. Ascorbic acid           |                 | 17.17             | 13.63 to 20.71                | <0.0001                     |
| <b><u>a-Glucosidase</u></b>          |                 |                   |                               |                             |
| CMEQ vs. Linalool                    |                 | 16.14             | 12.6 to 19.68                 | <0.0001                     |
| CMEQ vs. Ascorbic acid               |                 | 11.04             | 7.505 to 14.58                | <0.0001                     |
| Linalool vs. Ascorbic acid           |                 | -5.1              | -8.635 to -1.565              | 0.0028                      |
| <b><u>Aldose reductase</u></b>       |                 |                   |                               |                             |
| CMEQ vs. Linalool                    |                 | 23.86             | 20.32 to 27.4                 | <0.0001                     |
| CMEQ vs. Ascorbic acid               |                 | 54.2              | 50.66 to 57.74                | <0.0001                     |
| Linalool vs. Ascorbic acid           |                 | 30.34             | 26.8 to 33.88                 | <0.0001                     |
| <b><u>Sorbitol dehydrogenase</u></b> |                 |                   |                               |                             |
| CMEQ vs. Linalool                    |                 | 10.24             | 6.705 to 13.78                | <0.0001                     |
| CMEQ vs. Ascorbic acid               |                 | 38.52             | 34.98 to 42.06                | <0.0001                     |
| Linalool vs. Ascorbic acid           |                 | 28.28             | 24.74 to 31.82                | <0.0001                     |

Supplementary Table S4. Statistical comparison of the antibacterial activity in terms of disc diffusion assay between the CMEO, linalool and gentamicin.

| Tukey's<br>comparisons test          | multiple | Mean Diff. | 95.00% CI of diff. | Adjusted P<br>Value |
|--------------------------------------|----------|------------|--------------------|---------------------|
| <b><u>Escherichia coli</u></b>       |          |            |                    |                     |
| CMEO vs. Linalool                    |          | 0.3        | -0.1897 to 0.7897  | 0.3150              |
| CMEO vs. Genamicin                   |          | -3.2       | -3.69 to -2.71     | <0.0001             |
| Linalool vs. Genamicin               |          | -3.5       | -3.99 to -3.01     | <0.0001             |
| <b><u>Pseudomonas aeruginosa</u></b> |          |            |                    |                     |
| CMEO vs. Linalool                    |          | 1.5        | 1.01 to 1.99       | <0.0001             |
| CMEO vs. Genamicin                   |          | -0.8       | -1.29 to -0.3103   | 0.0006              |
| Linalool vs. Genamicin               |          | -2.3       | -2.79 to -1.81     | <0.0001             |
| <b><u>Staphylococcus aureus</u></b>  |          |            |                    |                     |
| CMEO vs. Linalool                    |          | -1.9       | -2.39 to -1.41     | <0.0001             |
| CMEO vs. Genamicin                   |          | -2.3       | -2.79 to -1.81     | <0.0001             |
| Linalool vs. Genamicin               |          | -0.4       | -0.8897 to 0.08968 | 0.1317              |
| <b><u>Bacillus cereus</u></b>        |          |            |                    |                     |
| CMEO vs. Linalool                    |          | -2.8       | -3.29 to -2.31     | <0.0001             |
| CMEO vs. Genamicin                   |          | -6.5       | -6.99 to -6.01     | <0.0001             |
| Linalool vs. Genamicin               |          | -3.7       | -4.19 to -3.21     | <0.0001             |
| <b><u>Streptococcus pyogenes</u></b> |          |            |                    |                     |
| CMEO vs. Linalool                    |          | -1.2       | -1.69 to -0.7103   | <0.0001             |
| CMEO vs. Genamicin                   |          | -2.5       | -2.99 to -2.01     | <0.0001             |
| Linalool vs. Genamicin               |          | -1.3       | -1.79 to -0.8103   | <0.0001             |
| <b><u>Salmonella enterica</u></b>    |          |            |                    |                     |
| CMEO vs. Linalool                    |          | 0.6        | 0.1103 to 1.09     | 0.0122              |
| CMEO vs. Genamicin                   |          | -2.5       | -2.99 to -2.01     | <0.0001             |
| Linalool vs. Genamicin               |          | -3.1       | -3.59 to -2.61     | <0.0001             |

Supplementary Table S5. Statistical comparison of the antibacterial activity in terms of MIC value between the CMEO, linalool and gentamicin.

| <b>Tukey's multiple comparisons test</b> | <b>Mean Difference</b> | <b>95.00% CI of difference</b> | <b>Adjusted P Value</b> |
|------------------------------------------|------------------------|--------------------------------|-------------------------|
| <b><u>Escherichia coli</u></b>           |                        |                                |                         |
| CMEO vs. Linalool                        | 0.375                  | 0.2877 to 0.4623               | <0.0001                 |
| CMEO vs. Genamicin                       | 0.675                  | 0.5877 to 0.7623               | <0.0001                 |
| Linalool vs. Genamicin                   | 0.3                    | 0.2127 to 0.3873               | <0.0001                 |
| <b><u>Pseudomonas aeruginosa</u></b>     |                        |                                |                         |
| CMEO vs. Linalool                        | 0.3                    | 0.2127 to 0.3873               | <0.0001                 |
| CMEO vs. Genamicin                       | 0.458                  | 0.3707 to 0.5453               | <0.0001                 |
| Linalool vs. Genamicin                   | 0.158                  | 0.07068 to 0.2453              | 0.0001                  |
| <b><u>Staphylococcus aureus</u></b>      |                        |                                |                         |
| CMEO vs. Linalool                        | 0.925                  | 0.8377 to 1.012                | <0.0001                 |
| CMEO vs. Genamicin                       | 0.925                  | 0.8377 to 1.012                | <0.0001                 |
| Linalool vs. Genamicin                   | 0                      | -0.08732 to 0.08732            | >0.9999                 |
| <b><u>Bacillus cereus</u></b>            |                        |                                |                         |
| CMEO vs. Linalool                        | 0.125                  | 0.03768 to 0.2123              | 0.0028                  |
| CMEO vs. Genamicin                       | 0.425                  | 0.3377 to 0.5123               | <0.0001                 |
| Linalool vs. Genamicin                   | 0.3                    | 0.2127 to 0.3873               | <0.0001                 |
| <b><u>Streptococcus pyogenes</u></b>     |                        |                                |                         |
| CMEO vs. Linalool                        | 0.3                    | 0.2127 to 0.3873               | <0.0001                 |
| CMEO vs. Genamicin                       | 0.458                  | 0.3707 to 0.5453               | <0.0001                 |
| Linalool vs. Genamicin                   | 0.158                  | 0.07068 to 0.2453              | 0.0001                  |
| <b><u>Salmonella enterica</u></b>        |                        |                                |                         |
| CMEO vs. Linalool                        | 0.3                    | 0.2127 to 0.3873               | <0.0001                 |
| CMEO vs. Genamicin                       | 0.458                  | 0.3707 to 0.5453               | <0.0001                 |
| Linalool vs. Genamicin                   | 0.158                  | 0.07068 to 0.2453              | 0.0001                  |
